# Supplementary material for: Influence of Roll Speed during Roll Compaction and Its Effect on the Prediction of Ribbon Solid Fraction
Source: MDPI journal article supplement (doi:10.3390/pharmaceutics14112399), 2022-11-07
Supplement: s1 [file s1]

# Influence of roll speed during roll compaction and its effect on the prediction of ribbon solid fraction

Martin Lück <sup>1</sup>, Matthias De Saeger <sup>1,2</sup> and Peter Kleinebudde <sup>1,\*</sup>

Supplementary Materials:

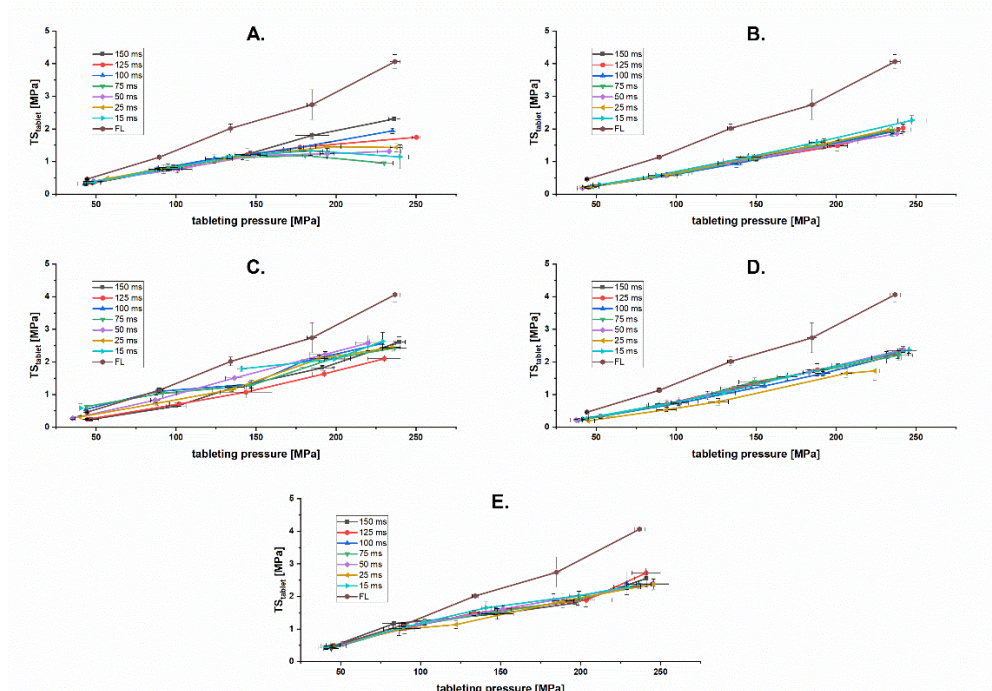

Figure S1: Tableability plot of lactose granules at  $P_{\text{max}}$  of 66 MPa (A), 98 MPa (B), 131 MPa (C), 161 MPa (D) and 193 MPa (E) and DT of 15-250 ms.

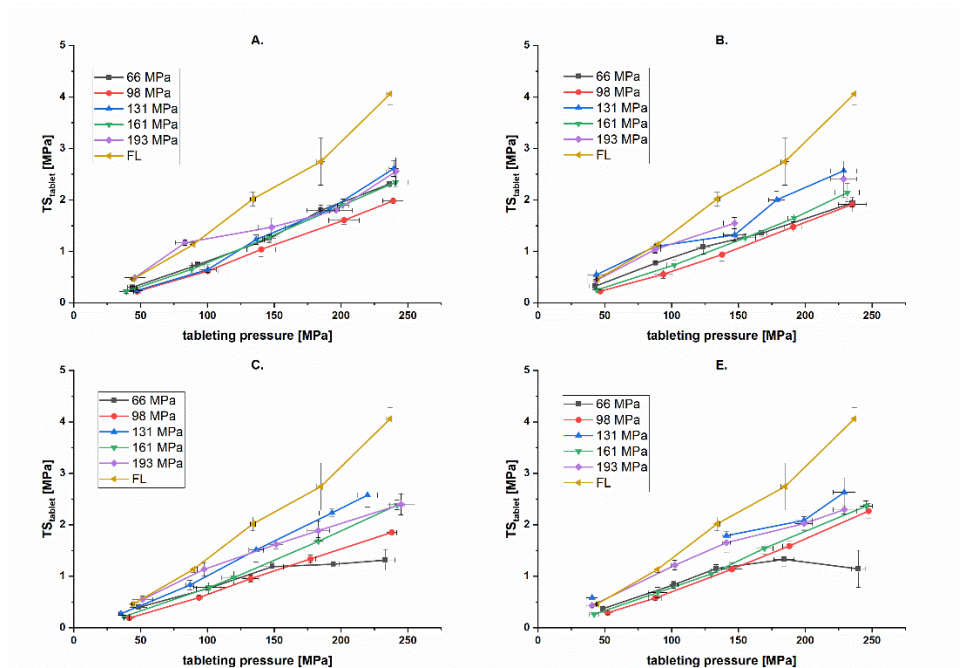

Figure S2: Tableability plot of lactose granules at DTs of 150 ms (A), 100 ms (B), 50 ms (C) and 15 ms (D) and  $P_{\text{max}}$  of 66-193 MPa.

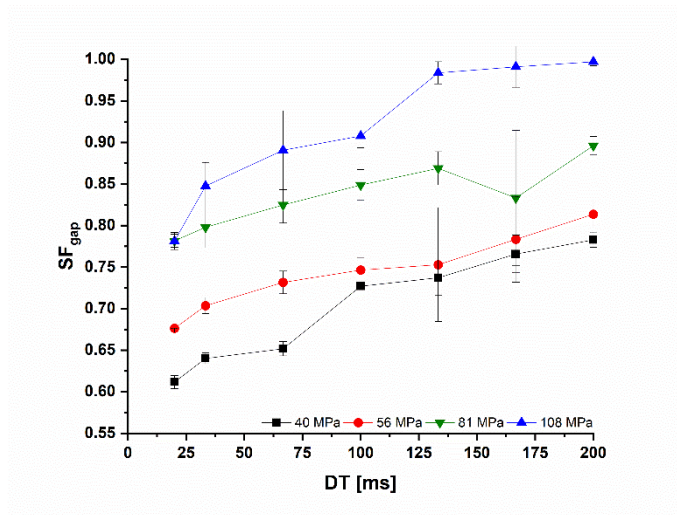

Figure S3: DT dependent  $SF_{gap}$  of MCC ribbons at different  $P_{max}$ ;  $\bar{x} \pm s$ ;  $n = 3$ .

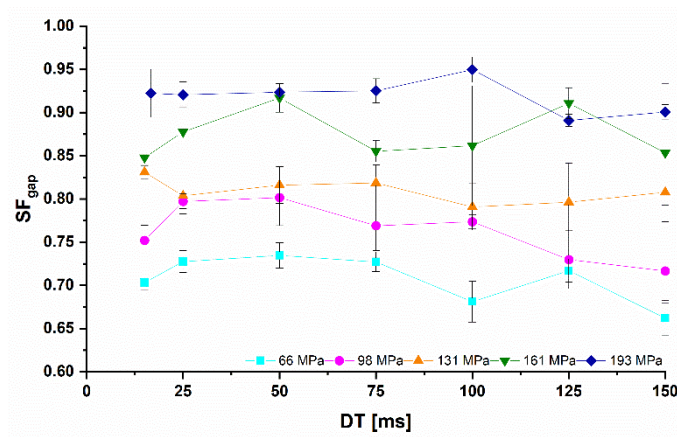

Figure S4: DT dependent  $SF_{gap}$  of lactose ribbons at different  $P_{max}$ ;  $\bar{x} \pm s$ ;  $n=3$ .
